# Supplementary material for: Parameterizing cloud condensation nuclei concentrations during HOPE
Source: Copernicus journal article supplement (doi:10.5194/acp-16-12059-2016), 2016-09-27
Supplement: Supplementary file 1 [file acp-16-12059-2016-supplement.zip]

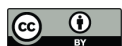

## *Supplement of*

# **Parameterizing cloud condensation nuclei concentrations during HOPE**

**Luke B. Hande et al.**

*Correspondence to:* Luke B. Hande ([luke.hande@kit.edu](mailto:luke.hande@kit.edu))

- [acp-16-12059-2016-supplement-title-page.pdf](#)
- [CCN\\_table\\_latex.txt](#)

The copyright of individual parts of the supplement might differ from the CC-BY 3.0 licence.
